# Supplementary material for: Enhancement in the photocatalytic activity of carbon nitride through hybridization with light-sensitive AgCl for carbon dioxide reduction to methane
Source: Royal Society of Chemistry journal article supplement (doi:10.1039/c5cy00767d), 2015-08-20
Supplement: c5cy00767d1.pdf [file c5cy00767d1.pdf]

## Electronic Supplementary Information

### **Enhancement in the Photocatalytic Activity of Carbon Nitride through Hybridization with Light-sensitive AgCl for Carbon Dioxide Reduction to Methane**

**Lutfi Kurnianditia Putri<sup>a</sup>, Wee-Jun Ong<sup>a</sup>, Wei Sea Chang<sup>b</sup> and Siang-Piao  
Chai<sup>a,\*</sup>**

*<sup>a</sup>. Chemical Engineering Discipline, School of Engineering, Monash University, Jalan  
Lagoon Selatan, Bandar Sunway, 47500 Selangor, Malaysia*

*<sup>b</sup>. Mechanical Engineering Discipline, School of Engineering, Monash University, Jalan  
Lagoon Selatan, Bandar Sunway, 47500 Selangor, Malaysia*

\* Corresponding author.

Tel: +603-5514 6234; Fax: +603-5514 6207

E-mail address: [chai.siang.piao@monash.edu](mailto:chai.siang.piao@monash.edu)

(1) CO<sub>2</sub> photocatalytic reduction supplementary data

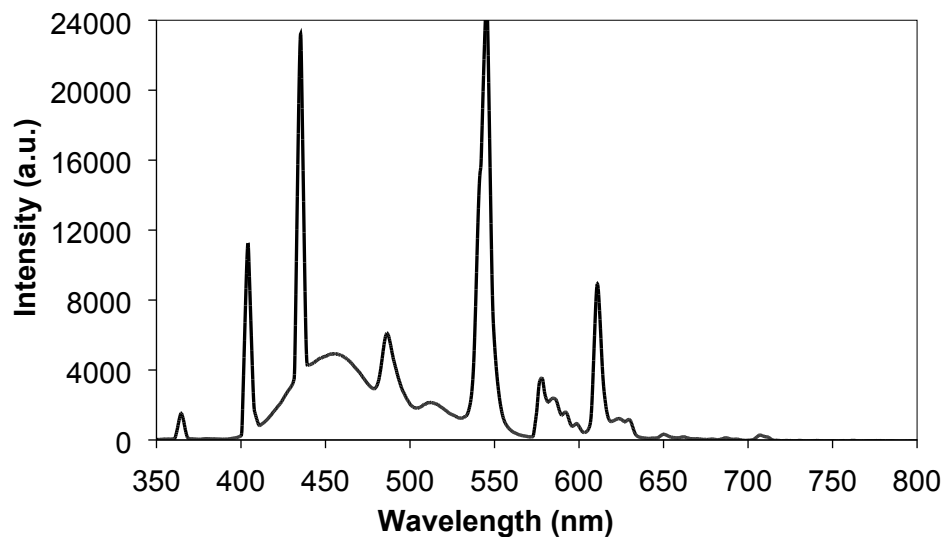

Figure S1. 15W daylight lamp spectrum

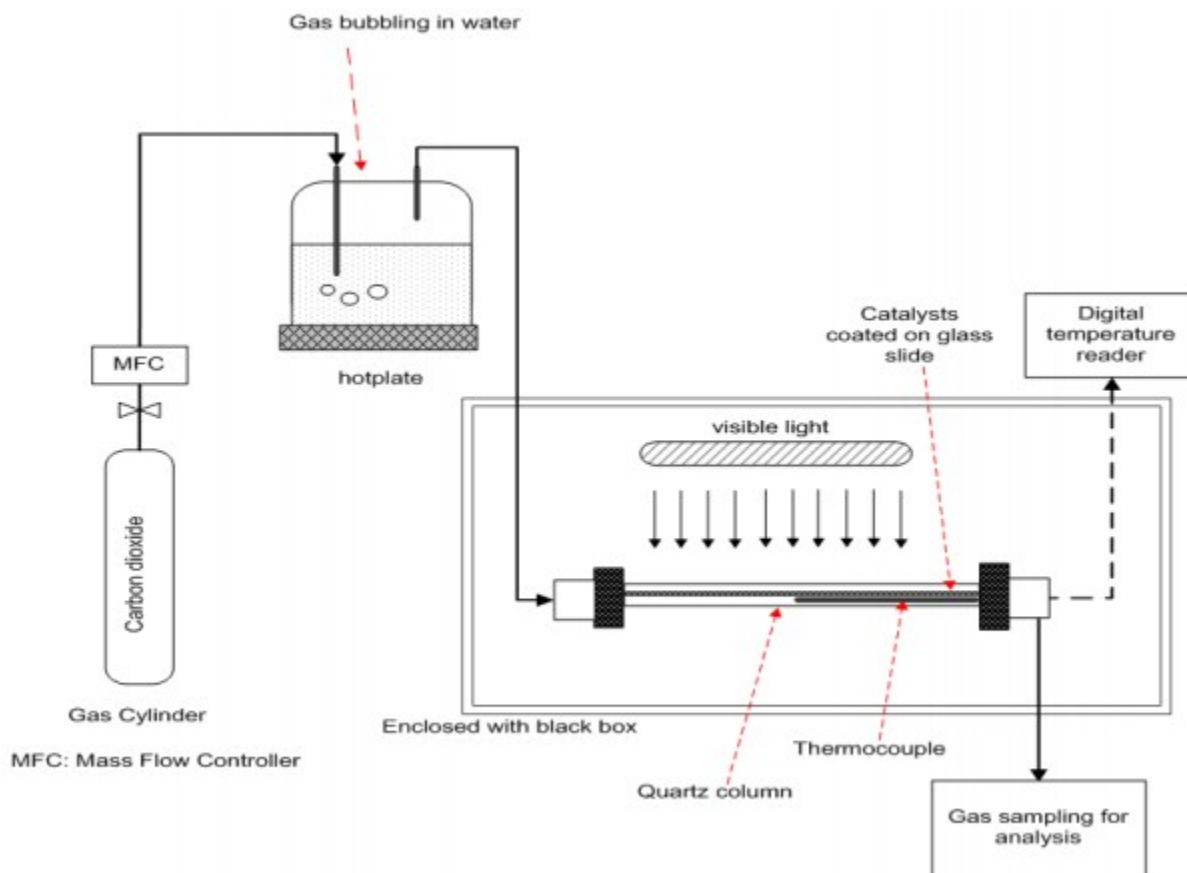

Figure S2. A schematic representation of the gas phase photocatalytic reactor setup

## (2) TEM image of urea-derived Carbon Nitride

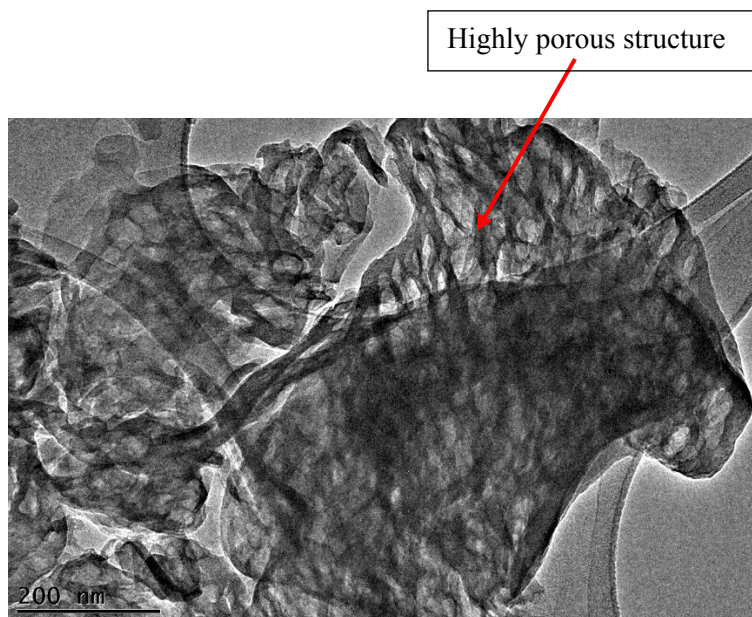

Figure S3. TEM image of as-prepared carbon nitride

## (3) Protonated CN (p-CN) FTIR analysis

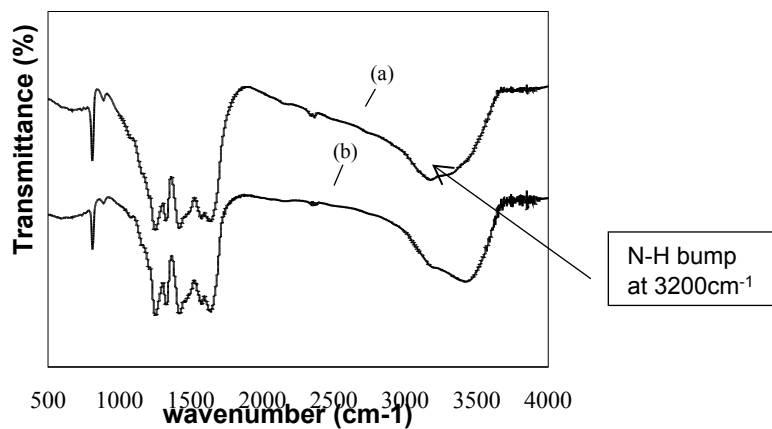

Figure S4. FTIR spectra of (a) protonated CN and (b) CN

#### (4) Particle distribution histogram

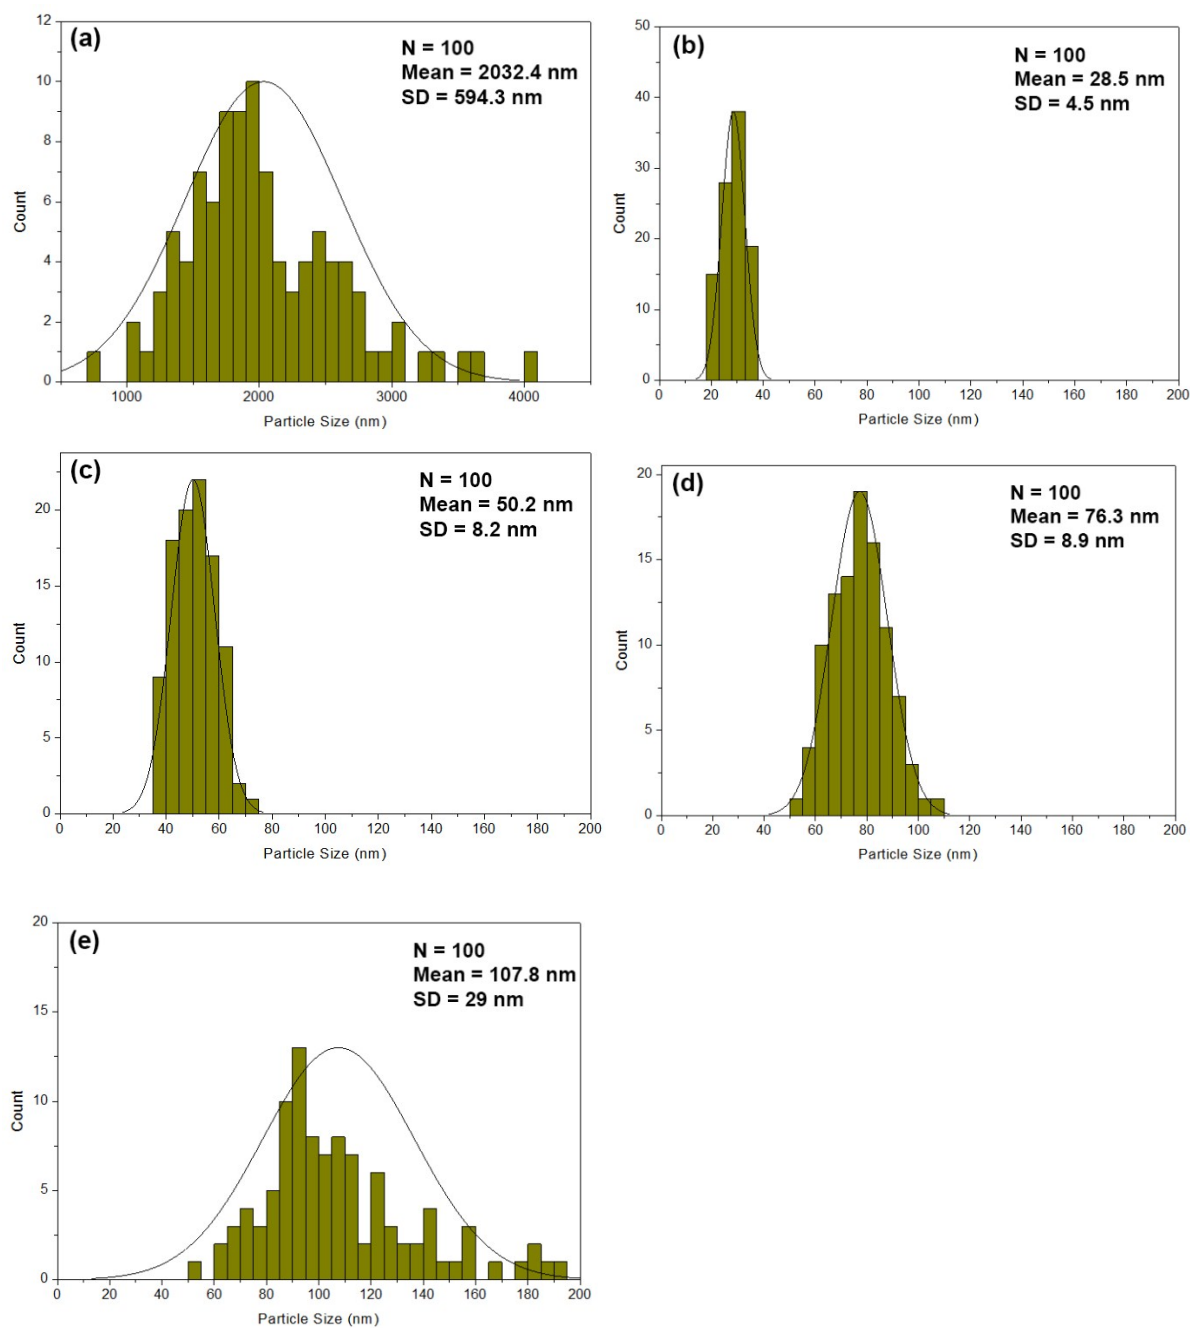

Figure S5 Particle distribution histogram for (a) AgCl (b) AgCl-10/CN (c) AgCl-30/CN (d) AgCl-50/CN (e) AgCl-70/CN

### (5) UV-Vis band gap determination

The band gap energies ( $E_g$ ) of CN and AgCl was obtained from the energy dependence equation of the absorption coefficient ( $\alpha$ ) for semiconductors

$$\alpha h\nu \propto (h\nu - E_g)^\eta$$

Where  $\alpha$ ,  $h$ ,  $\nu$ ,  $E$  are absorption coefficient, Planck constant, light frequency and band gap energy respectively. This  $\alpha$  can then be assumed to be proportional to the Kubelka-Munk function  $[F(R_\infty)]$  and with an appropriate choice of  $\eta$ , a plot of  $[F(R_\infty) \cdot h\nu]^{1/\eta}$  against  $h\nu$  is linear near the edge and the intercept of this line on  $[F(R_\infty) \cdot h\nu]^{1/\eta}=0$  (x-intercept) gives the optical absorption edge energy  $E_g$ . The exponent  $\eta$ , value is determined by the type of optical transition upon photon irradiation.  $\eta=2$  for indirect band gap semiconductors such as AgCl<sup>1</sup>. For all amorphous, polymeric materials, including CN,  $\eta=2$  since they exhibit energy dependence similar to that found in indirect transitions<sup>2</sup>.

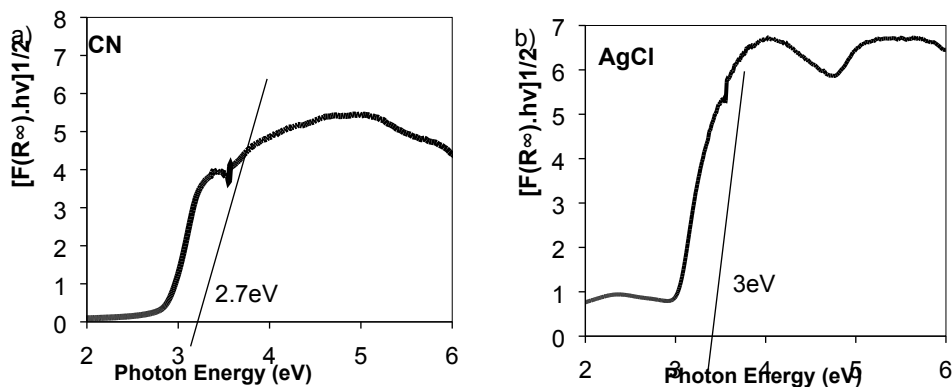

Figure S6. Kubelka-Munk transformed reflectance spectra of (a) carbon nitride (CN) and (b) silver chloride (AgCl)

### Supporting References

1. K. Dai, L. Lu, J. Dong, Z. Ji, G. Zhu, Q. Liu, Z. Liu, Y. Zhang, D. Li and C. Liang, *Dalton Transactions*, 2013, **42**, 4657-4662.
2. L. Han, P. Wang, C. Zhu, Y. Zhai and S. Dong, *Nanoscale*, 2011, **3**, 2931-2935.
